# Supplementary material
Source: Springer Nature journal article supplement (https://www.springermedizin.de/resource/supplementary/12879_2005_326_MOESM3_ESM.pdf/9448786)

**729 negative by all assays**

**DFA**

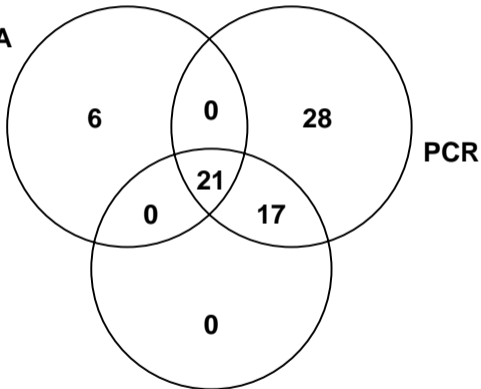

**PCR**

**Culture**

Supplement: MOESM3 [file 9448786]
